# Supplementary material for: Simultaneous Quantification of Steroid Hormones Using hrLC-MS in Endocrine Tissues of Male Rats and Human Samples
Source: MDPI journal article supplement (doi:10.3390/metabo12080714), 2022-07-30
Supplement: s1 [file s1]

## Supporting information S2: Supplementary tables

**Table S1. Summary of the six gradient utilised in optimization rounds to establish the best methodology with respect to peak intensity and analyte separation.**

|            | Gradient 1 |     | Gradient 2 |     | Gradient 3 |     | Gradient 4 |     | Gradient 5 |     | Gradient 6 |     |
|------------|------------|-----|------------|-----|------------|-----|------------|-----|------------|-----|------------|-----|
| Time (min) | % A        | % B | % A        | % B | % A        | % B | % A        | % B | % A        | % B | % A        | % B |
| 0          | 95         | 5   | 90         | 10  | 85         | 15  | 80         | 20  | 80         | 20  | 70         | 30  |
| 3.8        | -          | -   | 10         | 90  | 10         | 90  | 10         | 90  | 20         | 80  | 20         | 80  |
| 4          | 1          | 99  | 1          | 99  | 1          | 99  | 1          | 99  | 1          | 99  | 1          | 99  |
| 4.8        | 1          | 99  | 1          | 99  | 1          | 99  | 1          | 99  | 1          | 99  | 1          | 99  |
| 5          | 95         | 5   | 90         | 10  | 85         | 15  | 80         | 20  | 80         | 20  | 70         | 30  |

**Table S2. Summary z-spray source parameters optimized for  $m/z$  556.2771 in ES+ and ES-.**

| Parameter               | ES+       | ES-      |
|-------------------------|-----------|----------|
| Capillary voltage       | 1.00 kV   | 2.00 kV  |
| Sampling cone voltage   | 25        | 40       |
| Source Offset           | 80        | 80       |
| Source temperature      | 120 °C    | 120 °C   |
| Desolvation temperature | 450 °C    | 450 °C   |
| Desolvation gas flow    | 5.00 L/h  | 5.00 L/h |
| Cone gas flow           | 1,000 L/h | 600 L/h  |
| Nebuliser               | 6.00 bar  | 6.00 bar |

**Table S3. Summary of the five different extraction buffers tested in the recovery efficiency experiments.**

| Extraction buffer | % methanol | % H <sub>2</sub> O | pH modifier    |
|-------------------|------------|--------------------|----------------|
| Buffer 1          | 50         | 50                 | None           |
| Buffer 2          | 50         | 49                 | 1% formic acid |
| Buffer 3          | 25         | 75                 | None           |
| Buffer 4          | 25         | 74                 | 1% formic acid |
| Buffer 5          | 50         | 49.975             | 1 mM ammonia   |

The buffers differ in their methanol content and the compound utilised to tune the pH of the buffer (pH modifier).

**Table S4. Summary of the six urine samples collected to test the metabolomics assay.**

| Parameter       | U001      | U002     | U003     | U004      | U005     | U006      |
|-----------------|-----------|----------|----------|-----------|----------|-----------|
| Date (yyyymmdd) | 20210521  | 20210514 | 20210423 | 20210524  | 20210428 | 20210505  |
| Collection time | Afternoon | Morning  | Morning  | Afternoon | Morning  | Afternoon |
| Blood           | NEG       | NEG      | NEG      | NEG       | NEG      | NEG       |
| Ketone bodies   | NEG       | NEG      | NEG      | NEG       | NEG      | NEG       |
| Glucose         | NEG       | NEG      | NEG      | NEG       | NEG      | NEG       |
| pH              | 6         | 5        | 6        | 6         | 6        | 5         |
| Density (g/mL)  | 1.025     | 1.025    | 1.020    | 1.015     | 1.025    | 1.025     |

Collection time and urine characteristics of each sample are reported.
